# Supplementary material for: A Systematic Review of the Behavioral Responses by Stored-Product Arthropods to Individual or Blends of Microbially Produced Volatile Cues
Source: MDPI journal article supplement (doi:10.3390/insects12050391), 2021-04-28
Supplement: s1 [file s1]

## Supplementary Data

**Table S1.** Combinations of stored-product arthropods tested for their behavioral response to an assortment of complex microbial headspaces, including documented occurrences of attraction (+), repellency (−), or no statistical difference from included controls (○) in the primary literature.

| Arthropod & Microbial Taxon                                      | % Behavioral Response |     |     | N |
|------------------------------------------------------------------|-----------------------|-----|-----|---|
|                                                                  | −                     | ○   | +   |   |
| <b><i>Acanthoscelides obtectus</i></b>                           |                       |     |     |   |
| <i>Trichoderma harzianum</i> (multiple strains)                  | 25                    | 0   | 75  | 4 |
| <b><i>Carpophilus hemipterus</i></b>                             |                       |     |     |   |
| <i>Candida krusei</i> (inoculated food)                          | 0                     | 0   | 100 | 1 |
| <i>Saccharomyces cerevisiae</i> (pure culture & inoculated food) | 0                     | 0   | 100 | 3 |
| <b><i>Carpophilus humeralis</i></b>                              |                       |     |     |   |
| <i>Fusarium verticillioides</i> (NRRL25457)                      | 0                     | 0   | 100 | 1 |
| <b><i>Cryptolestes ferrugineus</i></b>                           |                       |     |     |   |
| <i>Aspergillus repens</i> (inoculated grain)                     | 0                     | 0   | 100 | 1 |
| <i>Cephalosporium acremonium</i> (inoculated grain)              | 0                     | 0   | 100 | 1 |
| <i>Fusarium</i> sp. (inoculated grain)                           | 0                     | 0   | 100 | 1 |
| <i>Penicillium corymbiferum</i> (inoculated grain)               | 0                     | 0   | 100 | 1 |
| <i>Scopulariopsis brevicaulis</i> (inoculated grain)             | 0                     | 0   | 100 | 1 |
| Spoiled grain from field                                         | 0                     | 0   | 100 | 1 |
| <i>Streptomyces</i> sp. (inoculated grain)                       | 0                     | 100 | 0   | 1 |
| <b><i>Cynaesus angustus</i></b>                                  |                       |     |     |   |
| <i>Cladosporium</i> sp. (inoculated maize flour)                 | 0                     | 0   | 100 | 1 |
| <b><i>Lariophagus distinguendus</i></b>                          |                       |     |     |   |
| <i>Aspergillus sydowii</i> (inoculated grain)                    | 100                   | 0   | 0   | 2 |
| <i>Aspergillus versicolor</i> (inoculated grain)                 | 100                   | 0   | 0   | 3 |
| <b><i>Liposcelis bostrychophila</i></b>                          |                       |     |     |   |
| Biodeteriorated paper incubated for 8 days                       | 100                   | 0   | 0   | 1 |
| <i>Eurotium amstelodami</i> (on malt-agar)                       | 100                   | 0   | 0   | 1 |
| <i>Ulocladium botrytis</i> (two strains on paper or agar)        | 66                    | 33  | 0   | 6 |
| <b><i>Oryzaephilus mercator</i></b>                              |                       |     |     |   |
| Brewer's yeast                                                   | 0                     | 0   | 100 | 2 |
| <b><i>Oryzaephilus surinamensis</i></b>                          |                       |     |     |   |
| Brewer's yeast                                                   | 50                    | 0   | 50  | 2 |
| <b><i>Plodia interpunctella</i></b>                              |                       |     |     |   |
| <i>Alternaria alternata</i>                                      | 0                     | 0   | 100 | 1 |
| <i>Aspergillus flavus</i>                                        | 0                     | 0   | 100 | 1 |
| <i>Fusarium graminearum</i>                                      | 0                     | 0   | 100 | 1 |

|                                                         |     |     |     |   |
|---------------------------------------------------------|-----|-----|-----|---|
| <i>Penicilium auranziogriseum</i>                       | 0   | 0   | 100 | 1 |
| <b><i>Sitophilus zeamais</i></b>                        |     |     |     |   |
| <i>Fusarium verticillioides</i> (various forms)         | 80  | 0   | 20  | 5 |
| <b><i>Tenebrio molitor</i></b>                          |     |     |     |   |
| <i>Beauveria bassiana</i>                               | 100 | 0   | 0   | 1 |
| <i>Fusarium avenaceum</i>                               | 100 | 0   | 0   | 1 |
| <i>Fusarium culmorum</i>                                | 0   | 0   | 100 | 1 |
| <i>Fusarium poae</i>                                    | 0   | 0   | 100 | 1 |
| <i>Fusarium proliferatum</i> (pure & inoculated grains) | 0   | 0   | 100 | 2 |
| <i>Fusarium</i> sp.                                     | 100 | 0   | 0   | 1 |
| <b><i>Tribolium castaneum</i></b>                       |     |     |     |   |
| <i>Alternaria solani</i> (triglycerides extract)        | 0   | 0   | 100 | 1 |
| <i>Aspergillus glaucus</i> (extracts) with spores       | 0   | 0   | 100 | 2 |
| <i>Aspergillus niger</i>                                | 0   | 100 | 0   | 1 |
| <i>Aspergillus ochraceus</i>                            | 50  | 50  | 0   | 2 |
| <i>Aspergillus tamarii</i>                              | 0   | 50  | 50  | 2 |
| <i>Aspergillus tubingensis</i>                          | 50  | 50  | 0   | 2 |
| <i>Aspergillus wentii</i>                               | 0   | 100 | 0   | 1 |
| <i>Byssoschamlys spectabilis</i>                        | 0   | 100 | 0   | 1 |
| Delinted cotton                                         | 50  | 50  | 0   | 2 |
| <i>Epicoccum nigrum</i>                                 | 1   | 0   | 0   |   |
| Fungal isolate (A, B, C, D, E isolate)                  | 20  | 60  | 20  | 5 |
| Fungal isolate (A, B, C, D, E isolate) + wheat seed     | 0   | 100 | 0   | 5 |
| Fungal-infected wheat kernels (direct & extracts)       | 0   | 0   | 100 | 3 |
| <i>Fusarium chlamydosporum</i>                          | 0   | 100 | 0   | 1 |
| <i>Fusarium proliferatum</i>                            | 0   | 100 | 0   | 1 |
| <i>Fusarium</i> sp.                                     | 0   | 100 | 0   | 1 |
| <i>Helminthosporium sativum</i> (triglycerides extract) | 0   | 0   | 100 | 1 |
| <i>Hypocrea</i> sp. (inoculated grain)                  | 0   | 100 | 0   | 1 |
| Linted cotton                                           | 0   | 33  | 66  | 3 |
| <i>Nigrospora sphaerica</i> (triglycerides extract)     | 0   | 0   | 100 | 1 |
| <i>Penicillium citrinum</i>                             | 100 | 0   | 0   | 1 |
| <i>Rhizopus oryzae</i>                                  | 0   | 100 | 0   | 2 |
| <i>Trichoderma harzianum</i>                            | 0   | 100 | 0   | 1 |
| Unknown fungi; obtained from cotton                     | 0   | 0   | 100 | 1 |
| <b><i>Tribolium confusum</i></b>                        |     |     |     |   |
| Fungal-produced acids                                   | 0   | 0   | 100 | 1 |
| <i>Penicillium chrysogenum</i>                          | 50  | 0   | 50  | 2 |
| <i>Penicillium citrinum</i>                             | 50  | 0   | 50  | 2 |
| <i>Penicillium crustosum</i>                            | 50  | 50  | 0   | 2 |

|                                                              |           |           |           |            |
|--------------------------------------------------------------|-----------|-----------|-----------|------------|
| <i>Penicillium cyclopium</i>                                 | 50        | 0         | 50        | 2          |
| <i>Penicillium expansum</i>                                  | 50        | 0         | 50        | 2          |
| <i>Penicillium griseofulvum</i>                              | 50        | 50        | 0         | 2          |
| <i>Penicillium martensii</i>                                 | 50        | 50        | 0         | 2          |
| <i>Penicillium oxalicum</i> (Isolate 787, 2300)              | 50        | 25        | 25        | 4          |
| <i>Penicillium palitans</i>                                  | 50        | 0         | 50        | 2          |
| <i>Penicillium puberulum</i>                                 | 50        | 0         | 50        | 2          |
| <i>Penicillium pulvillorum</i>                               | 50        | 0         | 50        | 2          |
| <i>Penicillium rubrum</i>                                    | 50        | 50        | 0         | 2          |
| <i>Penicillium stoloniferum</i>                              | 50        | 0         | 50        | 2          |
| <i>Penicillium urticae</i> (patulum)                         | 50        | 50        | 0         | 2          |
| <i>Penicillium viridicatum</i> (Isolate 5572, 5583, 60, 963) | 38        | 25        | 38        | 8          |
| <b><i>Typhaea stercorea</i></b>                              |           |           |           |            |
| <i>Aspergillus flavus</i>                                    | 0         | 0         | 100       | 1          |
| <b><i>Tyrophagus putrescentiae</i></b>                       |           |           |           |            |
| <i>Alternaria</i> sp. (plated)                               | 0         | 0         | 100       | 1          |
| <i>Aspergillus chevalieri</i> (plated)                       | 0         | 0         | 100       | 1          |
| <i>Aspergillus flavus</i> (plated)                           | 100       | 0         | 0         | 1          |
| <i>Aspergillus fumigatus</i> (plated)                        | 100       | 0         | 0         | 1          |
| <i>Aspergillus niger</i> (plated)                            | 100       | 0         | 0         | 1          |
| <i>Aspergillus oryzae</i> (plated)                           | 100       | 0         | 0         | 1          |
| <i>Microsporum gypseum</i> (plated)                          | 0         | 0         | 100       | 1          |
| <i>Trichophyton mentagrophytes</i> (plated)                  | 0         | 0         | 100       | 1          |
| <b>Overall response across taxa</b>                          | <b>34</b> | <b>24</b> | <b>41</b> | <b>140</b> |

**Table S2.** Combinations of stored-product arthropods tested for their behavioral response to an assortment of individual microbial compounds, including documented occurrences of attraction (+), repellency (-), or no statistical difference from included controls (○) in the primary literature.

| Arthropod Taxa & Compound Identity                                             | % Behavioral Response |     |     | N  |
|--------------------------------------------------------------------------------|-----------------------|-----|-----|----|
|                                                                                | –                     | ○   | +   |    |
| <i>Ahasverus advena</i>                                                        |                       |     |     |    |
| (R,S)-3-octanol                                                                | 33                    | 33  | 33  | 3  |
| 1-octen-3-one                                                                  | 33                    | 33  | 33  | 3  |
| 2-phenylethanol                                                                | 50                    | 0   | 50  | 2  |
| 3-methyl-1-butanol                                                             | 0                     | 50  | 50  | 2  |
| 3-octanone                                                                     | 33                    | 33  | 33  | 3  |
| ethanol                                                                        | 0                     | 50  | 50  | 2  |
| <i>Callosobruchus maculatus</i>                                                | 0                     | 0   | 0   |    |
| Binary mixture I [10-5 w/w nonanal, 10-6 w/w (E)-2-octenal]                    | 0                     | 0   | 100 | 1  |
| Binary mixture II [10-6 w/w nonanal, 10-6 w/w (E)-2-octenal]                   | 0                     | 0   | 100 | 1  |
| Binary mixture III [1-pentanol, 1-octen-3-ol]                                  | 0                     | 100 | 0   | 1  |
| Quaternary mixture [1-pentanol, nonanal, (E)-2-octenal, 3-carene]              | 100                   | 0   | 0   | 1  |
| Ternary mixture I [1-pentanol, nonanal, (E)-2-octenal]                         | 0                     | 0   | 100 | 1  |
| Ternary mixture II [3-carene, nonanal, (E)-2-octenal]                          | 100                   | 0   | 0   | 1  |
| <i>Carpophilus hemipterus</i>                                                  |                       |     |     |    |
| Ethyl acetate, acetaldehyde, 2-pentanol, 3-methyl-1-butanol                    | 0                     | 100 | 0   | 1  |
| Synthetic 18-component blend mimicking <i>S. cerevisiae</i> -inoculated banana | 0                     | 100 | 0   | 2  |
| <i>Cathartus quadricollis</i>                                                  | 0                     | 0   | 0   |    |
| (R,S)-3-octanol                                                                | 50                    | 0   | 50  | 2  |
| 1-octen-3-one                                                                  | 50                    | 0   | 50  | 2  |
| 2-phenylethanol                                                                | 50                    | 0   | 50  | 2  |
| 3-methyl-1-butanol                                                             | 0                     | 50  | 50  | 2  |
| 3-octanone                                                                     | 50                    | 0   | 50  | 2  |
| <i>Cryptolestes ferrugineus</i>                                                |                       |     |     |    |
| (R)-(-)-1-octen-3-ol (multiple isomers, with or without pheromone)             | 25                    | 50  | 25  | 12 |
| (R,S)-3-octanol                                                                | 33                    | 33  | 33  | 3  |

|                                                    |     |     |     |   |
|----------------------------------------------------|-----|-----|-----|---|
| 1-octen-3-one                                      | 33  | 33  | 33  | 3 |
| 2-ethyl-1-hexanol                                  | 0   | 0   | 100 | 1 |
| 2-phenylethanol                                    | 25  | 25  | 50  | 4 |
| 3-methyl-1-butanol                                 | 0   | 33  | 67  | 3 |
| 3-octanone                                         | 25  | 50  | 25  | 4 |
| 4-ethylacetophenone                                | 0   | 0   | 100 | 1 |
| hexanoic acid                                      | 0   | 0   | 100 | 1 |
| nonanal                                            | 0   | 0   | 100 | 1 |
| trans-3-octen-2-one                                | 0   | 0   | 100 | 1 |
| valeraldehyde                                      | 0   | 0   | 100 | 1 |
| <i>Holepyris sylvanidis</i>                        | 0   | 0   | 0   |   |
| (E)-2-nonenal                                      | 0   | 100 | 0   | 1 |
| 1-pentadecene                                      | 0   | 100 | 0   | 1 |
| 2-component mixture ((E)-2-nonenal, 1-pentadecene) | 100 | 0   | 0   | 1 |
| octanoic acid                                      | 0   | 0   | 100 | 1 |
| <i>Lariophagus distinguendus</i>                   | 0   | 0   | 0   |   |
| 1-octen-3-ol                                       | 50  | 0   | 50  | 2 |
| <i>Oryzaephilus mercator</i>                       |     |     |     |   |
| (R,S)-3-octanol                                    | 33  | 33  | 33  | 3 |
| 1-octen-3-one                                      | 0   | 50  | 50  | 2 |
| 2-phenylethanol                                    | 0   | 50  | 50  | 2 |
| 3-methyl-1-butanol                                 | 0   | 50  | 50  | 2 |
| 3-octanone                                         | 33  | 33  | 33  | 3 |
| ethanol                                            | 0   | 50  | 50  | 2 |
| propionic acid                                     | 100 | 0   | 0   | 1 |
| <i>Oryzaephilus surinamensis</i>                   |     |     |     |   |
| (R,S)-3-octanol                                    | 33  | 33  | 33  | 3 |
| 1-octen-3-one                                      | 0   | 50  | 50  | 2 |
| 2-phenylethanol                                    | 33  | 33  | 33  | 3 |
| 3-methyl-1-butanol                                 | 0   | 50  | 50  | 2 |
| 3-octanone                                         | 33  | 33  | 33  | 3 |
| ethanol                                            | 0   | 50  | 50  | 2 |
| <i>Plodia interpunctella</i>                       |     |     |     |   |
| 1-hexanol                                          | 0   | 50  | 50  | 2 |
| 3-methyl-1-butanol                                 | 33  | 33  | 33  | 3 |
| nonanal                                            | 0   | 50  | 50  | 2 |
| Phenylacetaldehyde                                 | 0   | 0   | 100 | 1 |
| <i>Sitophilus granarius</i>                        |     |     |     |   |
| (E)-2-hexenal (with or without wheat)              | 33  | 33  | 33  | 3 |
| (E)-2-hexenal + (E,E)-2,4-nonadienal + wheat       | 50  | 0   | 50  | 2 |
| (E,E)-2,4-decadienal (with or without wheat)       | 50  | 0   | 50  | 4 |

|                                                        |     |     |    |   |
|--------------------------------------------------------|-----|-----|----|---|
| (E,E)-2,4-heptadienal                                  | 33  | 33  | 33 | 3 |
| (E,E)-2,4-nonadienal (with or without wheat)           | 50  | 0   | 50 | 4 |
| 1-butanol                                              | 0   | 50  | 50 | 2 |
| 1-hexanol (with or without wheat)                      | 50  | 0   | 50 | 4 |
| 1-octanol                                              | 0   | 50  | 50 | 2 |
| 1-octen-3-ol                                           | 0   | 50  | 50 | 2 |
| 1-pentanol                                             | 33  | 33  | 33 | 3 |
| 2,3-butanedione                                        | 50  | 0   | 50 | 2 |
| 2,3-butanedione + wheat                                | 100 | 0   | 0  | 1 |
| 2-heptanone (with or without wheat)                    | 50  | 0   | 50 | 4 |
| 2-hexanone (with or without wheat)                     | 50  | 0   | 50 | 4 |
| 2- or 3-methyl-1-butanol                               | 0   | 100 | 0  | 2 |
| 2-pentanone                                            | 50  | 0   | 50 | 2 |
| 2-pentanone + wheat                                    | 100 | 0   | 0  | 1 |
| butanal (with or without wheat)                        | 50  | 0   | 50 | 4 |
| butanal + (E)-2-hexenal + wheat                        | 50  | 0   | 50 | 2 |
| butanal + (E,E)-2,4-nonadienal + wheat                 | 50  | 0   | 50 | 2 |
| butanal + (E)-2-hexenal + (E,E)-2,4-nonadienal + wheat | 50  | 0   | 50 | 2 |
| fufural + wheat                                        | 50  | 0   | 50 | 2 |
| heptanal (with or without wheat)                       | 50  | 0   | 50 | 4 |
| hexanal (with or without wheat)                        | 50  | 0   | 50 | 4 |
| Multilayer PCL coating + (E)-2-hexenal packaging       | 100 | 0   | 0  | 1 |
| pentanal                                               | 0   | 50  | 50 | 2 |
| <i>Sitophilus zeamais</i>                              |     |     |    |   |
| (E)-2-hexenal                                          | 100 | 0   | 0  | 1 |
| (E)-2-nonenal                                          | 100 | 0   | 0  | 1 |
| (E, Z)-2.6-nonadienal                                  | 100 | 0   | 0  | 1 |
| 1-butanol                                              | 50  | 50  | 0  | 2 |
| 1-hexanol                                              | 100 | 0   | 0  | 1 |
| 1-octen-3-ol                                           | 100 | 0   | 0  | 1 |
| 1-pentanal                                             | 100 | 0   | 0  | 1 |
| 1-pentanol                                             | 100 | 0   | 0  | 1 |
| 2-decanone                                             | 50  | 50  | 0  | 2 |
| 3-decanone                                             | 50  | 50  | 0  | 2 |
| 3-methyl-1-butanol                                     | 50  | 50  | 0  | 2 |
| 3-octanol                                              | 100 | 0   | 0  | 1 |
| 3-octanone                                             | 100 | 0   | 0  | 1 |
| Fumonisin B extract                                    | 33  | 67  | 0  | 3 |
| Maize exposed to 1-octen-3-ol                          | 100 | 0   | 0  | 1 |
| Maize exposed to 3-octanol                             | 100 | 0   | 0  | 1 |
| propionic acid                                         | 100 | 0   | 0  | 1 |

|                                                                      |           |           |           |            |
|----------------------------------------------------------------------|-----------|-----------|-----------|------------|
| <i>Tenebrio molitor</i>                                              |           |           |           |            |
| deoxynivalenol                                                       | 75        | 0         | 25        | 4          |
| <i>Tribolium castaneum</i>                                           |           |           |           |            |
| 1-butanol-3-methyl                                                   | 0         | 0         | 100       | 1          |
| 1-octen-3-ol                                                         | 100       | 0         | 0         | 1          |
| 2,3-butanediol                                                       | 0         | 0         | 100       | 1          |
| 2,3-butanediol + 2-pentanone-4-hydroxy-4-methyl + 1-butanol-3-methyl | 0         | 0         | 100       | 2          |
| 2-nonanone                                                           | 0         | 0         | 100       | 1          |
| 2-pentanone-4-hydroxy-4-methyl                                       | 0         | 100       | 0         | 1          |
| 3-methylanisol                                                       | 0         | 100       | 0         | 1          |
| 3-octanone                                                           | 0         | 100       | 0         | 1          |
| 5-methyl-3-heptanone                                                 | 100       | 0         | 0         | 1          |
| acetic acid                                                          | 0         | 0         | 100       | 1          |
| acetic acid + 1-butanol-3-methyl                                     | 0         | 0         | 100       | 1          |
| butyl acetate                                                        | 0         | 100       | 0         | 1          |
| hexanal                                                              | 0         | 100       | 0         | 1          |
| trans-2-hexenal                                                      | 50        | 0         | 50        | 4          |
| <i>Tribolium confusum</i>                                            |           |           |           |            |
| elaidic acid                                                         | 0         | 100       | 0         | 1          |
| myristic acid                                                        | 0         | 100       | 0         | 1          |
| oleic acid                                                           | 0         | 100       | 0         | 1          |
| stearic acid                                                         | 0         | 100       | 0         | 1          |
| <i>Trogoderma granarium</i>                                          |           |           |           |            |
| oleic acid                                                           | 50        | 0         | 50        | 2          |
| <i>Trogoderma inclusum</i>                                           |           |           |           |            |
| oleic acid                                                           | 50        | 0         | 50        | 2          |
| <i>Trogoderma variabile</i>                                          |           |           |           |            |
| oleic acid                                                           | 100       | 0         | 0         | 2          |
| <i>Tyrophagus putrescentiae</i>                                      |           |           |           |            |
| benzaldehyde                                                         | 0         | 100       | 0         | 1          |
| cedrol                                                               | 0         | 100       | 0         | 1          |
| cis-octa-1,5-dien-3-ol                                               | 0         | 100       | 0         | 1          |
| dihydrocarveol                                                       | 0         | 100       | 0         | 1          |
| trans-octa-1,5-dien-3-ol                                             | 0         | 100       | 0         | 1          |
| $\alpha$ -terpilene                                                  | 0         | 100       | 0         | 1          |
| $\beta$ -caryophyllene                                               | 0         | 100       | 0         | 1          |
| <b>Net behavioral response</b>                                       | <b>35</b> | <b>28</b> | <b>37</b> | <b>243</b> |
